# Supplementary material for: Non-traditional intrinsic luminescence from non-conjugated polymer dots: designing a hybrid biomaterial
Source: Royal Society of Chemistry journal article supplement (doi:10.1039/d1py01104a), 2021-01-01

## SUPPORTING INFORMATION

# **Non-Traditional Intrinsic Luminescence from Non-Conjugated Polymer Dots: Designing a Hybrid Biomaterial**

Rafaella F. Fernandes (\*), Giordano T. Paganoto and Marcia L.A.  
Temperini

---

Fundamental Chemistry Department, Institute of Chemistry, University of São  
Paulo, Av. Prof. Lineu Prestes 748, São Paulo, 05508-000, Brazil.

\*Corresponding author. E-mail address:  
[rafaella.fernandes@usp.br](mailto:rafaella.fernandes@usp.br) [luiz.oliveira@ufff.edu.br](mailto:luiz.oliveira@ufff.edu.br)

# INDEX

## 1. CHARACTERIZATION OF NCPDs

|                                      |           |
|--------------------------------------|-----------|
| 1.1 Dynamic Light Scattering.....    | Figure S1 |
| 1.2 Quantum yield calculations ..... | Figure S2 |
| 1.3 Elemental analysis (% CHN).....  | Figure S3 |
| 1.4 Vibrational assignments.....     | Table S1  |

## 2. CHARACTERIZATION OF CARBON DOTS FROM $\beta$ -GLUCAN

|                                         |           |
|-----------------------------------------|-----------|
| 2.1 UV/ VIS spectrum.....               | Figure S4 |
| 2.2 Fluorescence emission spectra ..... | Figure S5 |
| 2.3 Quantum yield calculations .....    | Figure S6 |
| 2.4 Raman spectra .....                 | Figure S7 |

## 3. CHARACTERIZATION OF THE METALLIC NANOPARTICLES

|                                            |           |
|--------------------------------------------|-----------|
| 3.1 TEM images and size distribution ..... | Figure S8 |
|--------------------------------------------|-----------|

**Figure S1:** DLS size distribution of hybrid nanomaterial sample showing a diameter of about 145 nm.

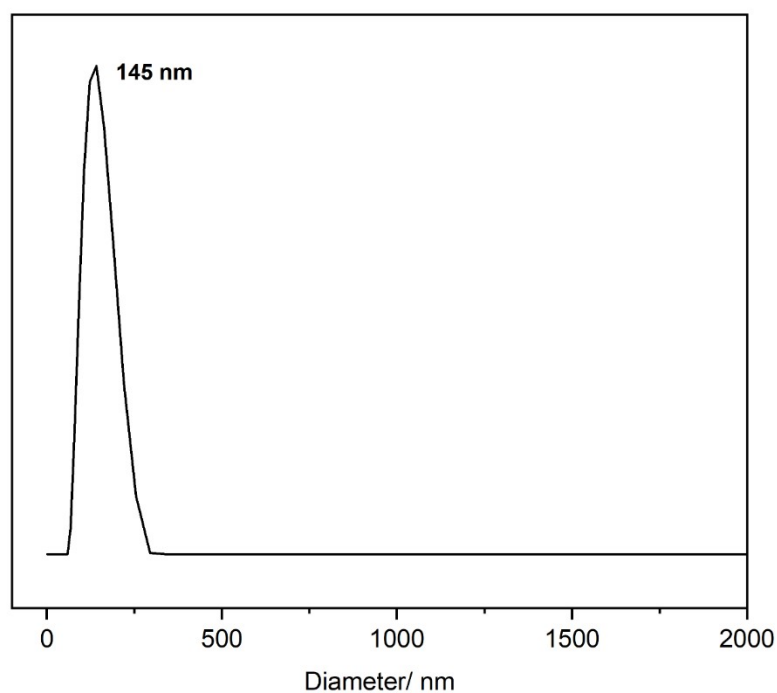

**Figure S2:** Different concentrations of NCPD (red) and quinine sulfate (blue), plotted by integrated PL intensity vs. absorbance and fitted for calculating the quantum yield, expressed in %.

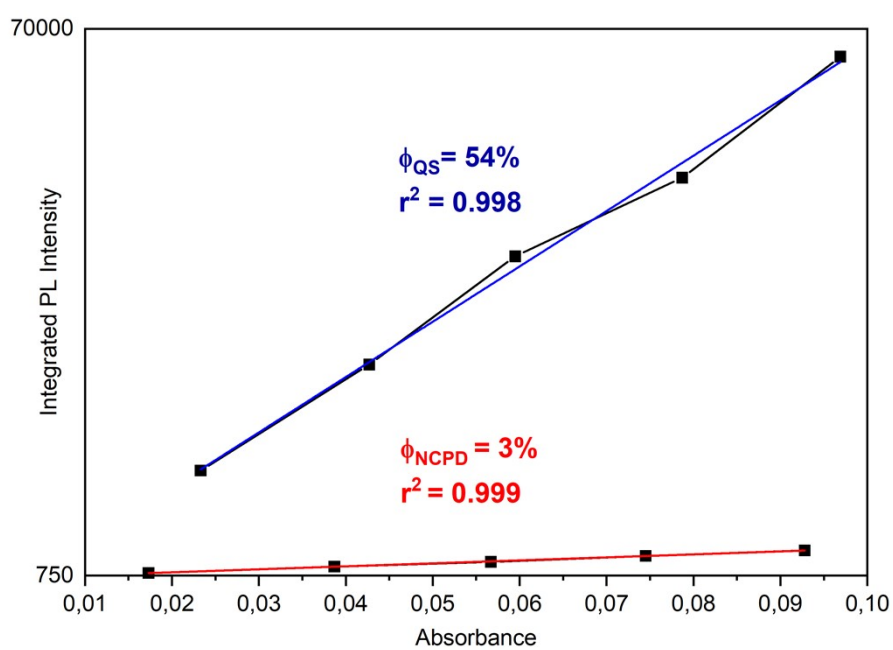

**Figure S3:** Elemental Analysis of NCPDs sample

| NCPDs         | % Carbon | % Hydrogen | % Nitrogen |
|---------------|----------|------------|------------|
| Measurement 1 | 38.24    | 6.49       | 0.45       |
| Measurement 2 | 38.35    | 6.56       | 0.48       |

**Table S1:** Tentative of vibrational assignment of NCPDs

| FT-Raman | IR         | SERS<br>633 nm |        | SERS<br>532 nm |        | Assignments                                                                          |
|----------|------------|----------------|--------|----------------|--------|--------------------------------------------------------------------------------------|
|          |            | AuNP           | AgNP   | AuNP           | AgNP   |                                                                                      |
|          | 3321 s     |                |        |                |        | $\nu(\text{NH}_2)$ , $\nu(\text{OH})$                                                |
| 2967 sh  |            |                |        |                |        | $\nu(\text{CH}_3)$                                                                   |
| 2932 s   |            |                |        |                |        | $\nu(\text{CH}_2)$                                                                   |
| 2912 s   | 2912 m     |                |        |                |        | $\nu(\text{CH})$                                                                     |
|          | 1708 w     |                |        |                |        | $\nu(\text{C}=\text{O})$                                                             |
|          | 1645 s     |                |        |                | 1656 w | Amide I                                                                              |
|          | 1635 broad |                |        |                |        | $\delta(\text{H}_2\text{O})$                                                         |
| 1617 s   |            |                | 1616 m |                | 1605 w | $\nu_{\text{as}}(\text{COO}^-)$ , $\omega(\text{CH}_2)$ ,<br>$\delta(\text{NH}_3)^+$ |
|          | 1540 m     |                |        |                | 1547 w | Amide II                                                                             |
| 1459 m   | 1460 sh    | 1459 m         | 1460 m |                | 1475 w | $\delta(\text{CH}_2)$                                                                |
|          |            | 1440 m         | 1440 m |                |        | $\beta(\text{CH}_2)$                                                                 |
| 1410 w   |            |                |        |                |        | $\nu_{\text{s}}(\text{COO}^-)$ , $\beta(\text{CH}_2)$                                |
| 1367 s   | 1365 m     | 1367 m         | 1357 m |                | 1365 w | $\delta(\text{COH})$ , $\delta(\text{CH})$                                           |
| 1330 s   | 1330 m     | 1315 s         | 1315 s |                | 1323 w | $\omega(\text{CH}_2)$ , $\nu(\text{COO}^-)$ , $\delta(\text{NH}_3)^+$                |
|          |            | 1296 m         | 1293 m |                | 1296 w | $\tau(\text{CH}_2, \text{HCC})$                                                      |
| 1259 w   | 1263 m     | 1254 m         | 1255 w |                |        | $\delta(\text{CH})$ , $\text{CH}_2\text{OH}$                                         |
| 1196 w   | 1196 w     |                |        |                |        | $\delta(\text{CH})$ , $\text{CH}_2\text{OH}$                                         |
|          | 1143 m     | 1143 w         | 1142 w |                |        | $\nu(\text{COC})$ , $\delta(\text{COH})$ , $\delta(\text{OCH})$                      |
| 1120 m   |            |                |        |                |        |                                                                                      |
| 1089 s   | 1067 sh    | 1089 w         | 1098 w |                |        | $\delta(\text{CO})$                                                                  |
|          | 1018 s     |                |        |                |        | $\nu(\text{CO})$                                                                     |
|          | 996 sh     |                |        |                |        | C-O valence vibration                                                                |
| 893 w    | 893 m      | 889 m          | 889 w  |                |        | $\delta(\text{C1-H})$ - beta                                                         |
| 765 m    |            |                |        |                |        | $\omega(\text{COO}^-)$                                                               |

**Key:** s – strong, m – medium, w – weak, sh – shoulder,  $\nu$  - stretching,  $\delta$  – bending,  $\sigma$  rocking,  $\beta$ - scissoring,  $\omega$ - wagging.

**Figure S4:** UV/Vis absorption spectrum of the  $\beta$ -glucan chemically extracted from the Usnea lichen after the heating process to provide the carbon dots.

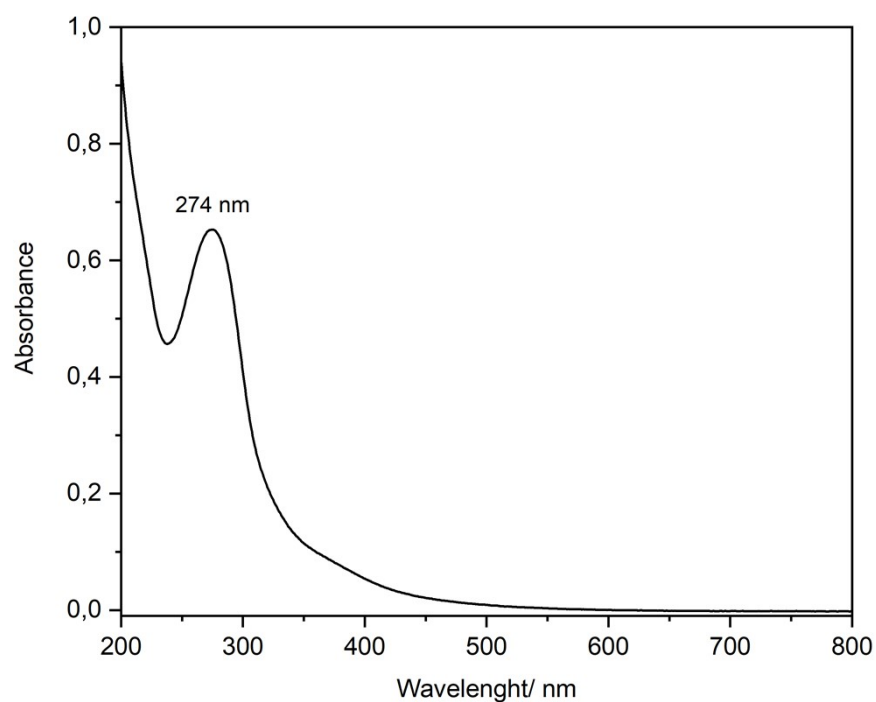

**Figure S5:** Emission-dependent PL spectra of the carbon dots from  $\beta$ -glucan

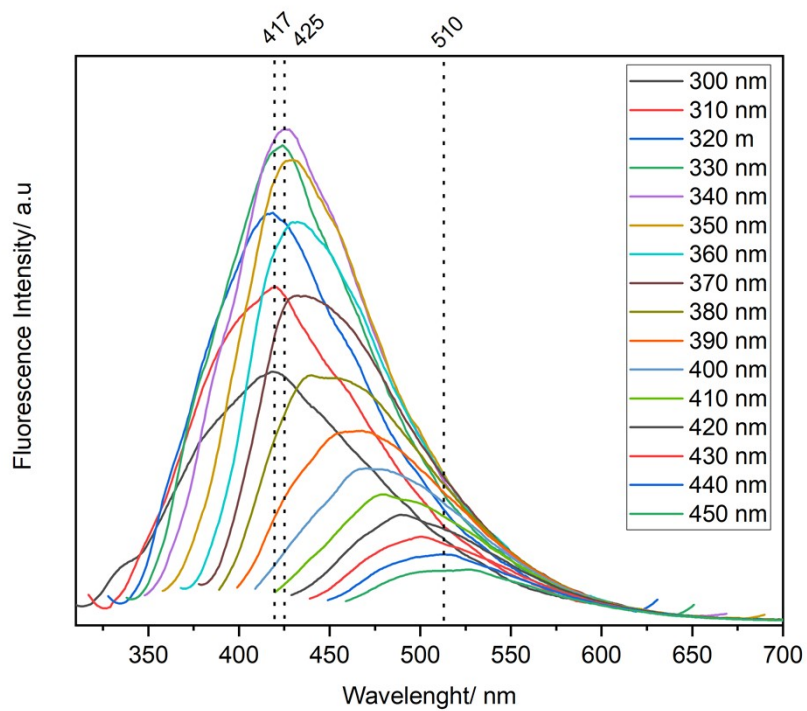

**Figure S6:** Different concentrations of carbon dots from  $\beta$ -glucan (red) and quinine sulfate (blue), plotted by integrated PL intensity vs. absorbance and fitted for calculating the quantum yield, expressed in %.

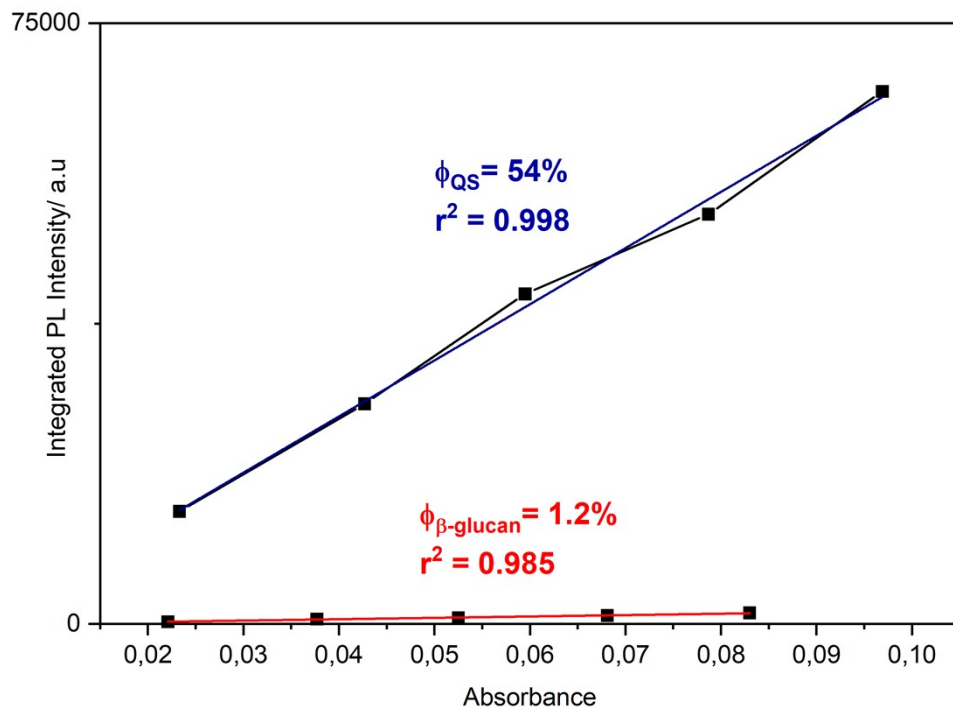

**Figure S7:** Raman spectra of the  $\beta$ -glucan before (red) and after (black) the heating process to provide the carbon dots showing the new band at  $1630\text{ cm}^{-1}$  due to the  $\nu(\text{COO}^-)$  vibrational mode.

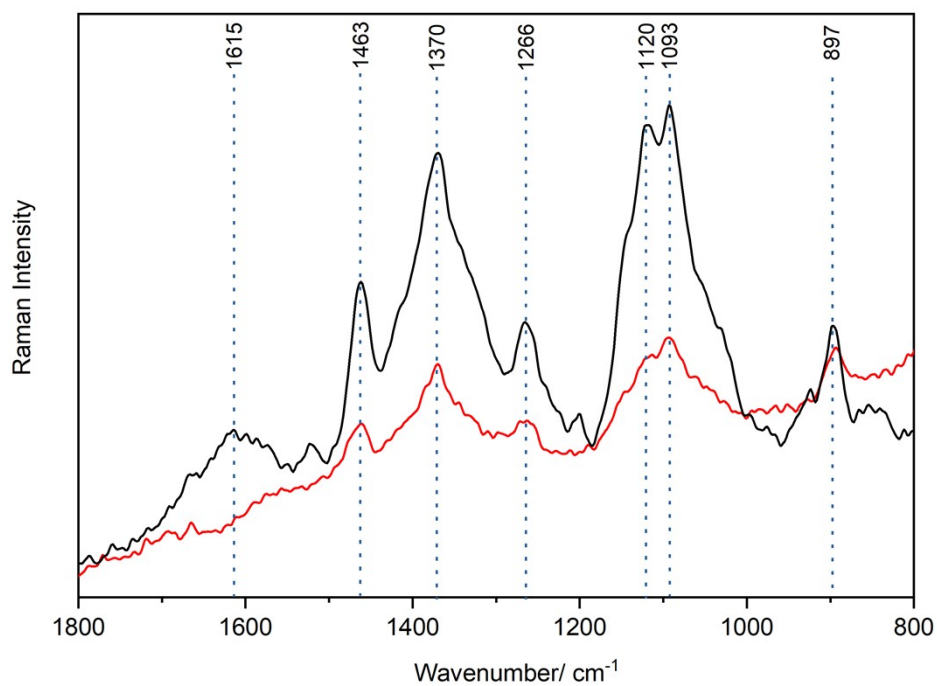

**Figure S8:** TEM images of A) AuNP and B) AgNP. Size distribution of C) AuNP and D) AgNP. The red and blue lines mean the size of nanoparticles.

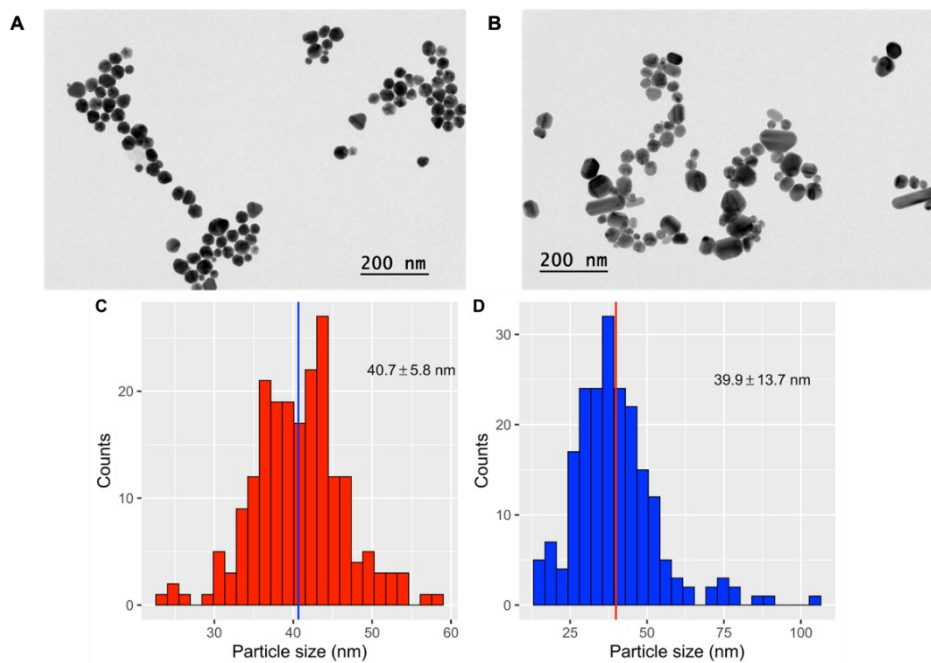

Supplement: d1py01104a1.pdf [file d1py01104a1.pdf]
